# Supplementary material for: Spatial Patterns in Hospital-Acquired Infections in Portugal (2014–2017)
Source: MDPI journal article supplement (doi:10.3390/ijerph18094703), 2021-04-28
Supplement: s1 [file s1]

**Table S1:** Description of the original database variables.

| Variable                    | Description                                                                                                                                                                                                                                                                                                                                                                                                                                                                                |
|-----------------------------|--------------------------------------------------------------------------------------------------------------------------------------------------------------------------------------------------------------------------------------------------------------------------------------------------------------------------------------------------------------------------------------------------------------------------------------------------------------------------------------------|
| ID                          | Episode identification number                                                                                                                                                                                                                                                                                                                                                                                                                                                              |
| Year                        | Civil Year, considering the discharge date.                                                                                                                                                                                                                                                                                                                                                                                                                                                |
| SEX                         | User gender<br>1 – Male<br>2 - Female                                                                                                                                                                                                                                                                                                                                                                                                                                                      |
| Age                         | Age of the user, in years, at the date of entry.                                                                                                                                                                                                                                                                                                                                                                                                                                           |
| District                    | User district of residence.                                                                                                                                                                                                                                                                                                                                                                                                                                                                |
| Municipality                | User municipality of residence.                                                                                                                                                                                                                                                                                                                                                                                                                                                            |
| Parish                      | User parish of residence.                                                                                                                                                                                                                                                                                                                                                                                                                                                                  |
| Date of admission           | Date of admission of the user to the health institution.                                                                                                                                                                                                                                                                                                                                                                                                                                   |
| Discharge date              | User discharge date of from the health institution.                                                                                                                                                                                                                                                                                                                                                                                                                                        |
| Length of stay              | Total number of days spent in the health facility by the user, according to the statistical definition of length of stay.                                                                                                                                                                                                                                                                                                                                                                  |
| Destination after discharge | Destination code of the user after discharge from a hospital service:<br>1 - For the home<br>2 - To another institution with internment<br>6 - Home service<br>7 - Exit against medical opinion<br>13 - Specialized aftercare (tertiary) (collected from 2011)<br>20 - Deceased<br>51 - Palliative care - medical center (collected from 2011)<br>61 - Post-hospital care (CMS 19-22, AP21) (collected from 2011)<br>63 - Long-term hospital care (CMS 19-22, AP 21) (collected from 2011) |
| Admission Type              | Nature or method of admission of a user to a health establishment:<br>1 - Scheduled<br>2 - Urgent<br>3 - Others                                                                                                                                                                                                                                                                                                                                                                            |
| Type of episode             | Type of episode:<br>AMB - Indicates if the episode was performed on the Ambulatory production line<br>INT- Indicates if the episode was performed on the production line Internment                                                                                                                                                                                                                                                                                                        |
| ICD version                 | Coding version (ICD)                                                                                                                                                                                                                                                                                                                                                                                                                                                                       |
| ddx1                        | ICD-9-CM or ICD-10 code, which identifies the Main Diagnosis of the episode - the one that is considered responsible for the patient's admission to the hospital.                                                                                                                                                                                                                                                                                                                          |
| ddx2...ddx30                | ICD-9-CM or ICD-10 Additional Diagnostics code for the episode (up to a maximum of 30).                                                                                                                                                                                                                                                                                                                                                                                                    |
| causad1                     | Code of ICD-9-CM or ICD-10 of External Cause 1 that took the user to the health institution.                                                                                                                                                                                                                                                                                                                                                                                               |
| causad2...causad30          | Additional ICD-9-CM or ICD-10 Cause Code that took the user to the health institution.                                                                                                                                                                                                                                                                                                                                                                                                     |
| SSI                         | Context of hospital infection "Surgical Site"<br>0 - Absent<br>1 - Present                                                                                                                                                                                                                                                                                                                                                                                                                 |
| Clostridium_difficile       | Context of hospital infection for "clostridium difficile"<br>0 - Absent<br>1 - Present                                                                                                                                                                                                                                                                                                                                                                                                     |
| pneumonia                   | Context of nosocomial infection "Pneumonia"<br>0 - Absent<br>1 - Present                                                                                                                                                                                                                                                                                                                                                                                                                   |
| trato_urinario_cateter      | Context of nosocomial infection "Urinary tract infection associated with the use of a catheter."<br>0 - Absent<br>1 - Present                                                                                                                                                                                                                                                                                                                                                              |

---

|                   |                                                                                             |
|-------------------|---------------------------------------------------------------------------------------------|
|                   | Context of nosocomial infection "Bloodstream infections related to central venous catheter" |
| corr_sang_cateter | 0 - Absent                                                                                  |
|                   | 1 - Present                                                                                 |
| Charlson_indexOri | Charlson's comorbidity index (CCI) score 0 (Min) - 33 (Max)                                 |
|                   | Identification of the location of the health institution (NUT II)                           |
|                   | NORTH                                                                                       |
|                   | CENTER                                                                                      |
| HospID_NUTSII     | LISBON REGION                                                                               |
|                   | ALENTEJO                                                                                    |
|                   | ALGARVE                                                                                     |

---
