# Supplementary material for: Spatial Patterns in Hospital-Acquired Infections in Portugal (2014–2017)
Source: MDPI journal article supplement (doi:10.3390/ijerph18094703), 2021-04-28
Supplement: s1 [file s1]

**Table S2.** ASHR values (min, max, mean) per 100,000 inhabitants.

| <b>Year</b> | <b>All</b>   | <b>Youth</b> | <b>Adults</b> | <b>Elderly</b> |
|-------------|--------------|--------------|---------------|----------------|
| 2014        | Min = 256.0  | Min = 29.4   | Min = 147.3   | Min = 1269.9   |
|             | Max = 846.7  | Max = 827.2  | Max = 571.1   | Max = 4279.9   |
|             | x = 480.5    | x = 268.6    | x = 229.1     | x = 2380.4     |
| 2015        | Min = 306.3  | Min = 46.6   | Min = 123.5   | Min = 1281.4   |
|             | Max = 1109.2 | Max = 997.6  | Max = 539.6   | Max = 4886.4   |
|             | x = 490.8    | x = 262.8    | x = 223.9     | x = 2511.29    |
| 2016        | Min = 280.2  | Min = 70.6   | Min = 99.5    | Min = 1323.3   |
|             | Max = 821.3  | Max = 795.0  | Max = 446.8   | Max = 5159.9   |
|             | x = 483.5    | x = 242.4    | x = 237.2     | x = 2449.7     |
| 2017        | Min = 270.0  | Min = 26.2   | Min = 119.6   | Min = 986.4    |
|             | Max = 879.3  | Max = 495.2  | Max = 346.1   | Max = 6230.0   |
|             | x = 435.5    | x = 208.6    | x = 202.3     | x = 2301.5     |

**Table S3.** Moran index values.

| <b>Year</b> | <b>All</b> | <b>Youth</b> | <b>Adults</b> | <b>Elderly</b> |
|-------------|------------|--------------|---------------|----------------|
| 2014        | 0.595      | 0.594        | 0.439         | 0.561          |
| 2015        | 0.522      | 0.648        | 0.351         | 0.561          |
| 2016        | 0.627      | 0.642        | 0.480         | 0.538          |
| 2017        | 0.526      | 0.550        | 0.488         | 0.519          |
